# Supplementary material for: Transgenic Expression of the Anti-parasitic Factor TEP1 in the Malaria Mosquito Anopheles gambiae
Source: PubMed Central journal article supplement (PMC5240933; doi:10.1371/journal.ppat.1006113), 2017-01-17
Supplement: ppat.1006113.s015.pdf [file ppat.1006113.s015.pdf]

## Plasmid sequences

### pDSAP-LRIM1-GFP

LOCUS pDSAPLrim1-GFP 7202 bp DNA circular 22-JUN-2016

FEATURES

|              |                                                    |
|--------------|----------------------------------------------------|
| misc_feature | Location/Qualifiers                                |
| misc_feature | complement(5317..5412)<br>/note="attL2"            |
| misc_feature | complement(5463..5481)<br>/note="M13R"             |
| misc_feature | 3718..3767<br>/note="3xP3 element"                 |
| misc_feature | complement(337..459)<br>/note="attr4"              |
| misc_feature | 271..286<br>/note="M13F"                           |
| misc_feature | 3141..3367<br>/note="SV40 term"                    |
| misc_feature | 3368..3644<br>/note="attB"                         |
| misc_feature | 3860..4508<br>/note="OpIE2 promoter"               |
| misc_feature | 4509..5110<br>/note="pac puromycin resistance ORF" |
| misc_feature | 5110..5269<br>/note="SV40 terminator"              |
| misc_feature | complement(5507..5525)<br>/note="pDONR-RP"         |
| misc_feature | 1455..1467<br>/note=""                             |
| misc_feature | 2375..2409<br>/note="UTR"                          |
| misc_feature | 468..2374<br>/note="Lrim1 promoter region"         |
| misc_feature | 2416..3135<br>/note="GFP"                          |
| source       | 1..7202<br>/dnas_title="pDSAPLrim1-GFP"            |

#### ORIGIN

```
1 CTTTCCTGCG TTATCCCCTG ATTCTGTGGA TAACCGTATT ACCGCCTTTG AGTGAGCTGA
61 TACCGCTCGC CGCAGCCGAA CGACCGAGCG CAGCGAGTCA GTGAGCGAGG AAGCGGAAGA
121 GCGCCCAATA CGCAAACCGC CTCTCCCCGC GCGTTGGCCG ATTCATTAAT GCAGCTGGCA
181 CGACAGGTTT CCCGACTGGA AAGCGGGCAG TGAGCGCAAC GCAATTAATA CGCGTACCGC
241 TAGCATGGAT GTTTTCCCAG TCACGACGTT GTAAAACGAC GGCCAGTCTT AAGCTCGGGC
301 CCCTACAGGT CACTAATACC ATCTAAGTAG TTGATTCATA GTGACTGGAT ATGTTGTGTT
361 TTACAGTATT ATGTAGTCTG TTTTTTATGC AAAATCTAAT TTAATATATT GATATTTATA
421 TCATTTTACG TTTCTCGTTC AACTTTTCTA TACAAAGTTg gtACcggATC CCGGGCACGC
481 TCAACAGTGC CTGAGAAGCA ATGAAAATTA ATTTCCATTT AAAGACGTGC TGTTTATGTT
541 TTTTTTATAA TGGCGGTTGA TTGAACCCGA ACAAACCTTG ACTTTGTGCT TTTGTACGTA
601 AGCTGCAAGG TTGGTGATGT GGTGGTGGT GATAAAAAGA CCAAATCTC CGATGCCAGT
661 GATAGTTTCG CTTCGAATGG GTTAGATTCT GTGAACACAT GTGAGGAAAT GGTTGTTCAA
721 TTTTTTTATG ACATCTTGGC TGTAACGTTT TCCAGCTGCT GGTATGAGAC GCGAACAATC
781 GGTGTGCTTG TTTGGCGCAC CCATTACACA TCTGGCTGCG TGAACCGCAC ATGTGGTATC
841 ATTAAGTGGC GATGACTGTG AAATTGTGAA TGAGCTGATA GTGACAACAA AAAAATCCAA
```

901 CAGTTTAAATA GTTCTTCTC GATTTGATCG TAAAACAAC TCAAAAAA TCCCAACTGC  
 961 TGAAGTGTGCC CATTAGTGTG GTGCTTACTG TGGAGAAAA AAAAAGCGAA CGCCAAGCAC  
 1021 AACGCAGTCA TTGTCTCGGT CCCTGTGGTC TTAATTTGAT TTTTATTTGT TTTTGGGACG  
 1081 TACGAAAGTG TGTTGTGAAC GGCCTGAAGT ATTTATTGTC GCGGTTCGGTA TGGCAGGCCA  
 1141 ACGCACCAAA CAACAAGACA CCCGCACACA TTGACGTTAA TATTTATGTT TGTTTATAAA  
 1201 ATTATTAACC GATCGTTACC CCTACCGGGC ACGGTGCTGG CTCGAGGTAG GTTCGAAGCG  
 1261 TTCAAACCAA CGATTTTGAC TGTCTTGGTC GAAAACGTGC TAGCGCCAGC ATGGTCACCG  
 1321 TACACAGaat cggTgcgTtt cgcgTttttg ttgacctgga tttggtctta tttttgtcac  
 1381 tttgttaact gcgagcagtg accgcggttg tacgacacgg tcaacagcgt ggtCGGATGC  
 1441 AGTAGCAGCA TCACCAATAC ACCCGTActt aaacatgcga gcacaacat tgctatcatg  
 1501 ctgaacgTtt gatgttaaaa cgcgTgtgac agcagaagaa tggTtcgctg tgtccgcggc  
 1561 tgctagcgat cgtaccacaa tcgaccgtaa agtgcacTct gcagctaatt agtcacagca  
 1621 caggTtcgaa tggcacagca gcaggTttga cacctctggt ttgcgaatga aattatcaga  
 1681 aggaaattgc cagcttTgtc tagtTttaca tgaatcatgt ggttcatatt tccatgacta  
 1741 attgacaagg tagtattcca ccgTgttTga ttctgttcat ctgctcggta cgggtTgttg  
 1801 tactttttaa acattttatt aaatatgtat gtattttaa aatatggcga agttcatgtt  
 1861 ttacattatt ataaacattg gacctgaaat aagtaatttt tccatttaat aaaaaaatt  
 1921 gtgttaaatt gcaagttatc actcaaatga tattgtgttc ttatcgaat attttaatgt  
 1981 aataactaca ttaaagataa aaattcta atcttcatta ctgaaagaaa aattgaatgt  
 2041 catattggTg gtaactgtta ctctttgttt taaaataatt atttccaag aaaaatatca  
 2101 catttttagtc ttcagttact ttgaatttta gcacaagaaa atcgTtaata ccacaagaat  
 2161 cggTacaatt atttttacat ttctgtaaaa aaagtatttc gaccaaacgc taccttccgt  
 2221 taagaaacgt ttcaaagatt caAGCTCTAG GGGATTGCAT CCgaagtcaa caaaacatg  
 2281 accccgcggg taccgcttat caggaggaaa tccccggcgg gcgaagctaa tcaactggcga  
 2341 ggcattggcat ctgcaccatc gctgtcagta gtgaGTGAAG CGCGATCGAG TAAGAACCGC  
 2401 AAACGAAAGA CCACCATGGT GAGCAAGGGC GAGGAGCTGT TCACCGGGT GGTGCCCATC  
 2461 CTGGTCGAGC TGGACGGCGA CGTAAACGGC ACAAGTTCA CCGTGTCCGG CGAGGGCGAG  
 2521 GGCATGGCCA CCTACGGCAA GCTACCCCTG AAGTTCATCT GCACCACCGG CAAGTGCACC  
 2581 GTGCCCTGGC CCACCCCTGT GACCACCCCTG ACCTACGGCG TGCAGTGCCT CAGCCGCTAC  
 2641 CCCGACCACA TGAAGCAGCA CGACTTCTTC AAGTCCGCCA TGCCCGAAGG CTACGTCCAG  
 2701 GAGCGCACCA TCTTCTTCAA GGACGACGGC AACTACAAGA CCCGCGCCGA GGTGAAGTTC  
 2761 GAGGGCGACA CCCTGGTGAA CCGCATCGAG CTGAAGGGCA TCGACTTCAA GGAGGACGGC  
 2821 AACATCCTGG GGCACAAGCT GGAGTACAAC TACAACAGCC ACAACGTCTA TATCATGGCC  
 2881 GacAAGCAGA AGAACGGCAT CAAGGTGAAC TTCAAGATCC GCCACAACAT CGAGGacCGC  
 2941 AGCGTGCAGC TCGCCGACCA CTACCAGCAG AACACCCCA TCGGCGacGG CCCCCTGCTG  
 3001 CTGCCCGaCA ACCACTACCT GAGCACCCAG TCCGCCCTGA GCAAagaCCC CAACGagaag  
 3061 CGCGATCACA TGGTCTGTCT GgaGTTCTGT ACCGCCGCCG GgatCacTCT CGGCATGGAC  
 3121 GAGCTGTACA AGTAAgcttC TAGACATAAT CAGCCATACC ACATTTGTAG AGGTTTTACT  
 3181 TGCTTTAAAA AACCTCCAC ACCTCCCCCT GAACCTGAAA CATAAAATGA ATGCAATTGT  
 3241 TGTTGTTAAC TTGTTTATTG CAGCTTATAA TGGTTACAAA TAAAGCAATA GCATCACAAA  
 3301 TTTACAAAAT AAAGCATTTT TCTTCACTGC ATTCTAGTTG TGGTTTGTCC AAATCATCA  
 3361 ATGTATCtCg aCGATGTAGG TCACaTCTC GAAGCCGCGG TGCGGGTGCC AGGGCGTGCC  
 3421 CTGGGGCTCC CCGGGCGCGT ACTCCACCTC ACCCATCTGG TCCATCATGA TGAACGGGTC  
 3481 GAGGTGGCGG TAGTTGATCC CGGCGAACGC GCGGCGCACC GGAAGCCCT CGCCCTCGAA  
 3541 ACCGCTGGGC GCGGTGGTCA CCGTGAGCAC GGGACGTGCG ACGGCGTCGG CCGGTGCGGA  
 3601 TACGCGGGGC AGCGTCAGCG GGTCTCGAC GGTACGGCG GGAattCCT GCAGACTTCC  
 3661 GGTATCTCGC GTTTGTTTGA TCGCACGGTT CCCACAATGG TTAATTCGAG CTCGCCCGGG  
 3721 GATCTAATTC AATTAGAGAC TAATTCAATT AGAGCTAATT CAATTAGGAT CCAAGCTTAT  
 3781 CGATTTGAT AAGCTTGATA TCGAATTCCT GCAGCCCGGG GGATCCActa gtggatcccc  
 3841 cgggctgcag gaattcgatC ATGATGATAA ACAATGTATG GTGCTAATGT TGCTTCAACA  
 3901 ACAATCTGTG TGAAGTGTG TTTTATGTTT GCCAACAAGC ACCTTTTATC TCGGTGGCCT  
 3961 CCCACCACC AACTTTTTTTG CACTGCAAAA AAACACGCTT TTGCACGGG GCCCATACAT  
 4021 AGTACAAACT CTACGTTTCG TAGACTATTT TACATAAATA GTCTACACCG TTGTATACGC  
 4081 TCCAAATACA CTACCACACA TTGAACCTTT TTGCAGTGCA AAAAAGTACG TGTCGGCAGT  
 4141 CACGTAGGCC GGCCTTATCG GGTGCGGTCC TGTCACGTAC GAATCACATT ATCGGACCGG  
 4201 ACGAGTGTG TCTTATCGTG ACAGGACGCC AGCTTCCTGT GTTGCTAACC GCAGCCGGAC  
 4261 GCAACTCCTT ATCGGAACAG GACGCGCCTC CATATCAGCC GCGGTTATC TCATGCGCGT

```

4321 GACCGGACAC GAGGCGCCCG TCCCCTTAT CGCGCCTATA AATACAGCCC GCAACGATCT
4381 GGTAACACA GTTGAACAGC ATCTGTTTGA ATTAATTCgG GATCTgccgg gCTGCAGCAC
4441 GTGTTGACAA TTAATCATCG GCATAGTATA TCGGCATAGT ATAATACGAC TCACTATAGG
4501 AGGGCCACcA TGaccgagta caagcccacg gtgcgctcgc ccaccgcgca cgacgtcccc
4561 Agggccgtac gcaccctcgc cgccgcgttc gccgactacc ccgccacgcg ccacaccgtc
4621 gaTccggacc gccacatcga gggggtcacc gagctgcaag aactcttctt cagcgcgctc
4681 gggctcgaca tcggcaaggt gtgggtcgcg gacgacggcg ccgcggtggc ggtctggacc
4741 acgccggaga gcgtcgaagc gggggcggtg ttcgccgaga tcggcccgcg catggccgag
4801 ttgagcggtt cccggctggc cgcgctggtt cctggccacc gtcggcgtct cgcccacca ccagggcaag
4861 cccaaggagc ccgctgggtt gctcccgcga gtcggcgtct cgcccacca ccagggcaag
4921 ggtctgggca gcgctcgtc gctcccgcga gtcggcgtct cgcccacca ccagggcaag
4981 gccttcctgg agacctccgc gccccgcaac ctccccttct acgagcggct cggggtgcc
5041 gtcaccgcgc acgtcgagGt gcccgaagga ccgcgcacct ggtgcatgac ccgcaagccc
5101 ggtgcctgaC TCGACCTCGA AACTTGTTTA TTGCAGCTTA TAATGGTTAC AAATAAGCA
5161 ATAGCATCAC AAATTTTACA AATAAAGCAT TTTTTTCACT GCATTCTAGT TGTGGTTTTGT
5221 CCAAATCAT CAATGTATCT TATCATGTCT ggatcatggg gggggccccG TACGGCGCGC
5281 CTAGAGCGGC CGCCACCGCG GTGGAGCTCG AGTACCCAGC TTTCTTGTAC AAAGTTGGCA
5341 TTATAAGAAA GCATTGCTTA TCAATTTGTT GCAACGAACA GGTCACTATC AGTCAAATA
5401 AAATCATTAT TTGCCATCCA GCTGCAGGGC GGCCGCGATA TCCCCTATAG TGAGTCGTAT
5461 TACATGGTCA TAGCTGTTTC CTGGCAGCTC TGGCCCGTGT CTCAAATCT CTGATGTTAC
5521 ATTGCACAAG ATAAAAATAT ATCATCATGA ACAATAAAAC TGTCTGCTTA CATAAACAGT
5581 AATACAAGGG GTGTTATGAG CCATATTCAA CGGGAAACGT CGAGGCCGCG ATTAAATTCC
5641 AACATGGATG CTGATTTATA TGGGTATAAA TGGGCTCGCG ATAATGTCCG GCAATCAGGT
5701 GCGACAATCT ATCGCTTGTA TGGGAAGCCC GATGCGCCAG AGTTGTTTCT GAAACATGGC
5761 AAAGGTAGCG TTGCCAATGA TGTTACAGAT GAGATGGTCA GACTAAACTG GCTGACGGAA
5821 TTTATGCCTC TTCCGACCAT CAAGCATTTT ATCCGTACTC CTGATGATCC ATGGTTACTC
5881 ACCATGCGA TCCCAGAAA AACAGCATTC CAGGTATTAG AAGAATATCC TGATTCAGGT
5941 GAAAATATTG TTGATGCGCT GGCAGTGTTC CTGCGCCGGT TGCATTCGAT TCCTGTTTGT
6001 AATTGTCCTT TTAACAGCGA TCGCGTATTT CGTCTCGCTC AGGCGCAATC ACGAATGAAT
6061 AACGGTTTGG TTGATGCGAG TGATTTTGAT GACGAGCGTA ATGGCTGGCC TGTTGAACAA
6121 GTCTGGAAAG AAATGCATAA ACTTTTGCCA TTCTCACCAG ATTCAGTCGT CACTCATGGT
6181 GATTTCTCAC TTGATAACCT TATTTTGTAC GAGGGGAAAT TAATAGGTTG TATTGATGTT
6241 GGACGAGTCG GAATCGCAGA CCGATACCAG GATCTTGCCA TCCTATGGAA CTGCCTCGGT
6301 GAGTTTTCTC CTTCATTACA GAAACGGCTT TTTCAAAAAT ATGGTATTGA TAATCCTGAT
6361 ATGAATAAAT TGCAGTTTCA TTTGATGCTC GATGAGTTTT TCTAATCAGA ATTTGGTTAAT
6421 TGTTTGTAAC ACTGGCAGAG CATTACGCTG ACTTGACGGG ACGGCGCAAG CTCATGACCA
6481 AAATCCCTTA ACGTGAGTTA CGCGTCGTTT CACTGAGCGT CAGACCCCGT AGAAAAGATC
6541 AAAGGATCTT CTTGAGATCC TTTTTTCTG CGCGTAATCT GCTGCTTGCA AACAAAAAAA
6601 CCACCGCTAC CAGCGGTGGT TTGTTTGCCG GATCAAGAGC TACCAACTCT TTTTCCGAAG
6661 GTAACGGCTC TCAGCAGAGC GCAGATACCA AATACTGTTC TTCTAGTGTA GCCGTAGTTA
6721 GGCCACCACT TCAAGAACTC TGTAGCACCG CCTACATACC TCGCTCTGCT AATCCTGTTA
6781 CCAGTGGCTG CTGCCAGTGG CGATAAGTCG TGTCTTACCG GGTGGACTC AAGACGATAG
6841 TTACCGGATA AGGCGCAGCG GTCGGGCTGA ACGGGGGGTT CGTGCACACA GCCCAGCTTG
6901 GAGCGAACGA CCTACACCGA ACTGAGATAC CTACAGCGTG AGCTATGAGA AAGCGCCACG
6961 CTTCGCCAAG GGAGAAAGGC GGACAGGTAT CCGGTAAGCG GCAGGGTCGG AACAGGAGAG
7021 CGCACGAGGG AGCTTCCAGG GGGAAACGCC TGGTATCTTT ATAGTCTTGT CCGGTTTTCG
7081 CACCTCTGAC TTGAGCTCG ATTTTTGTGA TGCTCGTCAG GGGGGCGGAG CCTATGGAAA
7141 AACGCCAGCA ACGCGGCCTT TTTACGGTTC CTGGCCTTTT GCTGGCCTTT TGCTCACATG
7201 TT

```

//

**pDSAT-APL1-GFP**

LOCUS pDSAT 7006 bp DNA circular 22-JUN-2016

| FEATURES     | Location/Qualifiers                        |
|--------------|--------------------------------------------|
| misc_feature | complement(5121..5216)<br>/note="attL2"    |
| misc_feature | complement(5267..5285)<br>/note="M13R"     |
| misc_feature | 3831..3880<br>/note="3xP3 element"         |
| misc_feature | 3920..3927<br>/note="TATA"                 |
| misc_feature | complement(337..459)<br>/note="attR4"      |
| misc_feature | 271..286<br>/note="M13F"                   |
| misc_feature | 3254..3480<br>/note="SV40 term"            |
| misc_feature | 3481..3757<br>/note="attB"                 |
| misc_feature | 4836..5057<br>/note="SV40 term"            |
| misc_feature | 4091..4807<br>/note="mTurquoise2"          |
| misc_feature | complement(5311..5329)<br>/note="DONR-RP"  |
| misc_feature | 468..2485<br>/note="APL1c Promoter region" |
| misc_feature | 2465..2485<br>/note="Race UTR"             |
| misc_feature | 2486..2518<br>/note="UTR"                  |
| misc_feature | 2465..2518<br>/note="Exon1"                |
| misc_feature | complement(2523..3225)<br>/note="GFP"      |
| source       | 1..7006<br>/dnas_title="pDSAT APL1_GFP"    |

ORIGIN

```

1 CTTTCCTGCG TTATCCCCTG ATTCTGTGGA TAACCGTATT ACCGCCTTTG AGTGAGCTGA
61 TACCGCTCGC CGCAGCCGAA CGACCGAGCG CAGCGAGTCA GTGAGCGAGG AAGCGGAAGA
121 GCGCCCAATA CGCAAACCGC CTCTCCCCGC GCGTTGGCCG ATTCATTAAT GCAGCTGGCA
181 CGACAGGTTT CCCGACTGGA AAGCGGGCAG TGAGCGCAAC GCAATTAATA CGCGTACCGC
241 TAGCATGGAT GTTTTCCCAG TCACGACGTT GTAAAACGAC GGCCAGTCTT AAGCTCGGGC
301 CCCTACAGGT CACTAATACC ATCTAAGTAG TTGATTCATA GTGACTGGAT ATGTTGTGTT
361 TTACAGTATT ATGTAGTCTG TTTTTTATGC AAAATCTAAT TTAATATATT GATATTTATA
421 TCATTTTACG TTTCTCGTTC AACTTTTCTA TACAAAGTTg gtACcggATC Ccttctggtc
481 tgtgtgcgag ggttattagg aaggtgatta ggattaggaa gggaacatta aacaAttatt
541 tatttaattt attttctatg acaagcaact gtaaaataaa gtagcataat tgtagcacia
601 ttagtatata aaaaattaat tatatcaatt gctacgtcaa tgatctagtt aagacactac
661 gaccggctgg aaggttttta tcgcgcatat ttagtctggg gcagtttagt tataccataa
721 catccacaac aggtgctgga attattgctc aaaagtcggt ataaattcga cgctagtcgg
781 aaaagtctcc agaatcaaaa tccggacacA cagtcgtcGg gagtcggtgt cgtcacgagt
841 tgaagtaggc cgatatctgc gccattcgta gtagaacatc atcgtacagt tgcaatcttc
901 caaattgaac tgtcgacatt ctctcattgt aacacttttt cttacaaca gcgccacaat
961 gactaagtcg cattgggatg aaagatggcc aaaattatgt acatactttt tttaataaag
1021 ctttgctgat gtatttttta aacagtggtt caatcaaagc tctgcttggt taatacacac
1081 acaaagtgaa gaaagaaaa caaaaacaaa atgtaatacc ttatcaciaa Cacattgcac
1141 aggtcgtcta cgactgcgag atcgatcggc tacgtctcgg acgccaatct ccgaactcca
1201 aaagactctg aacgaatcgg agtaaggggt gcactcgggg ggttccggtt tctccggagc

```

1261 taaaatcaaa tcaataata gctgcgcccc gttcagagac gcggagagtg aaacccatca  
1321 ctagtttggg ttgtttgcga accgacgagg tagttttgaa caccgaaccg aaagaacat  
1381 gggcatgtag aagatggtta tcatgcagct attaagcata gcgctttgGa tgaatttctg  
1441 tattgataac aaacatctca ggatacactt ttttccattt ccttttttatt catcataccc  
1501 aacgtcaacc cgacgatgtc atcaggtatg tgtatattag ctgacattgA atgttggagc  
1561 gaaagaacaa gttegtctcac ctgttagata ttgctttgca gatcgctaca aCccagatac  
1621 aaccagggtc cgagcatcct Ggacaattat taccgggtca tgccatgacg aagtgtttt  
1681 tcgtaagcga cacctgcaac aatgaagcca ttttttctta ttttttgttt ttccatcatg  
1741 aaaacacgaa ctggctatta tttctctggt Aaaagatatt taaatctaaa catgaacatc  
1801 acatcccaag tttccgggtca cccagatgat ggtgaaatgc ttttGcagct tcaaaaaaac  
1861 catgctcaat agcaatcaca actaaatgtc tcattctgct gctttgggaa tccccgtgct  
1921 gcgaacgggt tcgaagtgc ccgcaaagtt caatattgtg catccagcct ctgccgatcg  
1981 cacattatca gcattgctcg agtggaagac ctctcgcaca tctatacaca cgcactCtct  
2041 ccctctctct ctttatctct ctcacacGtt ctcggGTGAG CAGCATCGAT CGCACCTCAA  
2101 AGCACAATCA AAAACATGCA GTGGTATTTG CTCagaacag ttcgtgctaa tacaagtagg  
2161 tttgtcgcac aatcactaca cttttcggaa tctcaaTagt aagagatgtc tGcaaacacc  
2221 tgtcccaacc aatGatgttg gatcgggtccc agcttgtacg gtcgacctt gccctcgaaa  
2281 atcacaccag actgtagtga gttaaaataa acacaaaatc cggcaaTtgc tgggcAgcgt  
2341 tgggtcgaat ttactcaatc attacatttg ttttcatttt caggacgccg ttatcactgg  
2401 gaattcccgt aacgaattca tctttcagtg tgctacgcta gttctaccgc aggaatgatt  
2461 gctcagtttc aatccatcat tcgagGAAGA AACACAGTTT TCGAGCATTG AGTACCACaA  
2521 CCACCACCAT GGTGAGCAAG GGCGAGGAGC TGTTACCCGG GGTGGTGCCC ATCCTGGTCG  
2581 AGCTGGACGG CGACGTAAAC GGCCACAAGT TCAGCGTGTG CCGCGAGGGC GAGGGCGATG  
2641 CCACCTACGG CAAGCTGACC CTGAAGTTCA TCTGCACCAC CGGCAAGCTG CCCGTGCCCT  
2701 GGCCACCCT CGTGACCACC CTGACCTACG GCGTGCAGTG CTTAGCCGC TACCCCGACC  
2761 ACATGAAGCA GCACGACTTC TTCAAGTCCG CCATGCCCGA AGGCTACGTG CAGGAGCGCA  
2821 CCATCTTCTT CAAGGACGAC GGCAACTACA AGACCCGCGC CGAGGTGAAG TTCGAGGGCG  
2881 ACACCTTGGT GAACCGCATC GAGCTGAAGG GCATCGACTT CAAGGAGGAC GGCAACATCC  
2941 TGGGGCACAA GCTGGAGTAC AACTACAACA GCCACAACGT CTATATCATG GCCGacAAGC  
3001 AGAAGAACGG CATCAAGGTG AACTTCAAGA TCCGCCACAA CATCGAGGaC GGCAGCGTGC  
3061 AGCTCGCCGA CCACTACCAG CAGAACACCC CCATCGGCGa cGGCCCCGTG CTGCTGCCCG  
3121 aCAACCACTA CCTGAGCACC CAGTCCGCCC TGAGCAAaga CCCCACGAg aagCGCGATC  
3181 ACATGGTCCT GCTGgaGTTc GTGACCGCCG CCGGgatCac TCTCGGCATG GACGAGCTGT  
3241 ACAAGTAAgc ttCTAGACAT AATCAGCCAT ACCACATTTG TAGAGGTTTT ACTTGCTTTA  
3301 AAAAACCTCC CACACCTCCC CCTGAACCTG AAACATAAAA TGAATGCAAT TGTTGTTGTT  
3361 AACTTGTTTA TTGCAGCTTA TAATGGTTAC AAATAAAGCA ATAGCATCAC AAATTTCA  
3421 AATAAAGCAT TTTTCTTCAC TGCATTCTAG TTGTGGTTTT TCCAAACTCA TCAATGTATC  
3481 tcgaCGATGT AGGTCACaGT CTCGAAGCCG CGGTGCGGGT GCCAGGGCGT GCCCTTGGGC  
3541 TCCCCGGGCG CGTACTCCAC CTCACCCATC TGGTCCATCA TGATGAACGG GTCGAGGTGG  
3601 CGGTAGTTGA TCCCGGCGAA CGCGCGGCGC ACCGGGAAGC CCTCGCCCTC GAAACCGCTG  
3661 GGCGCGGTGG TCACGGTGAG CACGGGACGT GCGACGGCGT CCGCGGGTGC GGATACGCGG  
3721 GGCAGCGTCA GCGGGTTCTC GACGGTCACG GCGGGCAatt CCTGCAGACT TCCGGTATCT  
3781 CGCGTTTGTT TGATCGCACG GTTCCCACAA TGGTTAATTC GAGCTCGCCC GGGGATCTAA  
3841 TTCAATTAGA GACTAATTCA ATTAGAGCTA ATTCAATTAG GATCCAAGT TATCGATTTT  
3901 GAACCTCGA CCGCCGGAGT ATAAATAGAG GCGCTTCGTC TACGGAGCGA CAATTC AATT  
3961 CAAACAAGCA AAGTGAACAC GTCGCTAAGC GAAAGCTAAG CAAATAAACA AGCGCAGCTG  
4021 AACAAGCTAA ACAATCGGGG TACCGCTAGA GTCGACGGTA CCGCGGGCCC GGGATCCACC  
4081 GGTGCCCAcc atgggtgagca agggcgagga gctgttcacc ggggtggtgc ccatcctggt  
4141 cgagctggac ggcgacgtaa acggccacaa gttcagcgtg tccggcgagg gcgagggcga  
4201 tgccacctac GGCAAGCTGA CCCTGAAGTT Catctgcacc accggcaagc tgcccgtgcc  
4261 ctggcccacc ctcgtgacca ccctgtcctg gggcgtgcag tgcttcgccc gctaccccga  
4321 ccacatgaag cagcacgact tcttcaagtc cgccatgccc gaaggctacg tccaggagcg  
4381 caccatcttc ttcaaggacg acggcaacta caagaccgc gccgaggtga agttcgaggg  
4441 cgacaccctg gtgaaccgca tcgagctgaa gggcatcgac ttcaaggagg acggcaacat  
4501 cctggggcac aagctggagt acaactacTt Tagcgacaac gtctatatca ccgccgacaa  
4561 gcagaagaac ggcacatcaagg ccaacttcaa gatccgccac aacatcgagg acggcggcgt  
4621 gcagctcgcc gaccactacc agcagaacac ccccatcggc gacggccccg tgctgctgcc

```

4681 cgacaaccac tacctgagca cccagtccaa gctgagcaaa gaccccaacg agaagcgcga
4741 tcacatgggtc ctgctggagt tctgaccgc cgccgggatc actctcggca tggacgagct
4801 gtacaagtcc ggaTGataga tctgacgggt gatcaAATCA GCCATACCAC ATTTGTAGAG
4861 GTTTTACTTG CTTTAAAAAA CCTCCCACAC CTCCCCCTGA ACCTGAAACA TAAAATGAAT
4921 GCAATTGTTG TTGTAACTT GTTTATTGCA GCTTATAATG GTTACAAATA AAGCAATAGC
4981 ATCACAAATT TCACAAATAA AGCATTTTTT TCACTGCATT CTAGTTGTGG TTTGTCCAAA
5041 CTCATCAATG TATCTTAAAG CTTATCGATA CGCGTACGGC GCGCCTAGAG CGGCCGCCAC
5101 CGCGGTGGAG CTCGAGTACC CAGCTTCTT GTACAAAGT GGCATTATAA GAAAGCATTG
5161 CTTATCAATT TGTTGCAACG AACAGGTCAC TATCAGTCAA AATAAAATCA TTATTTGCCA
5221 TCCAGTGCA GGGCGGCCG GATATCCCCT ATAGTGAGTC GTATTACATG GTCATAGCTG
5281 TTTCTGGCA GCTCTGGCC GTGTCTCAA ATCTCTGATG TTACATTGCA CAAGATAAAA
5341 ATATATCATC ATGAACAATA AAAGTGTCTG CTTACATAAA CAGTAATACA AGGGGTGTTA
5401 TGAGCCATAT TCAACGGGAA ACGTCGAGGC CGCGATTAAA TTCCAACATG GATGCTGATT
5461 TATATGGGTA TAAATGGGCT CGCGATAATG TCGGGCAATC AGGTGCGACA ATCTATCGCT
5521 TGTATGGGAA GCCCGATGCG CCAGAGTTGT TTCTGAAACA TGGCAAAGGT AGCGTTGCCA
5581 ATGATGTTAC AGATGAGATG GTCAGACTAA ACTGGCTGAC GGAATTTATG CCTCTCCGA
5641 CCATCAAGCA TTTTATCCGT ACTCCTGATG ATGCATGGTT ACTCACCCT GCGATCCCCG
5701 GAAAAACAGC ATTCCAGGTA TTAGAAGAAT ATCCTGATTC AGGTGAAAAT ATTTGTTGATG
5761 CGCTGGCAGT GTTCTGCGC CGGTTGCATT CGATTCTGT TTGTAATTGT CCTTTTAAACA
5821 GCGATCGCGT ATTTCTGCTC GCTCAGGCGC AATCACGAAT GAATAACGGT TTGGTTGATG
5881 CGAGTGATTT TGATGACGAG CGTAATGGCT GGCCTGTTGA ACAAGTCTGG AAAGAAATGC
5941 ATAACTTTT GCCATTCTCA CCGGATTGAG TCGTCACTCA TGGTGATTTT TCACCTGATA
6001 ACCTTATTTT TGACGAGGGG AAATTAATAG GTTGTATTGA TGTGGACGA GTCGGAATCG
6061 CAGACCGATA CCAGGATCTT GCCATCCTAT GGAAGTGCCT CGGTGAGTTT TCTCCTTCAT
6121 TACAGAAACG GCTTTTTCAA AAATATGGTA TTGATAATCC TGATATGAAT AAATGTCAGT
6181 TTCATTTGAT GCTCGATGAG TTTTCTAAT CAGAATTGGT TAATGGTTG TAACACTGGC
6241 AGACATTAC GCTGACTTGA CGGCAGGCG CAAGTCATG ACCAAAATCC CTTAACGTGA
6301 GTTACCGGTC GTTCCACTGA GCGTCAGACC CCGTAGAAAA GATCAAAGGA TCTTCTTGAG
6361 ATCCTTTTTT TCTGCGCGTA ATCTGCTGCT TGCAAACAAA AAAACCACCG CTACCAGCGG
6421 TGGTTTGTGTT GCCGGATCAA GAGCTACCAA CTCTTTTCC GAAGGTAACT GGCTTCAGCA
6481 GAGCGCAGAT ACCAAATACT GTTCTTCTAG TGTAGCCGTA GTTAGGCCAC CACTTCAAGA
6541 ACTCTGTAGC ACCGCCTACA TACCTCGCTC TGCTAATCCT GTTACCAGTG GCTGCTGCCA
6601 GTGGCGATAA GTCGTGTCTT ACCGGGTTGG ACTCAAGACG ATAGTTACCG GATAAGGCGC
6661 AGCGGTCGGG CTGAACGGGG GGTTCGTGCA CACAGCCCAG CTGGGAGCGA ACGACCTACA
6721 CCGAACTGAG ATACCTACAG CGTGAGCTAT GAGAAAGCG CACGCTTCCC GAAGGGAGAA
6781 AGGCGGACAG GTATCCGGTA AGCGGCAGG TCGGAACAGG AGAGCGCACG AGGGAGCTTC
6841 CAGGGGAAA CGCCTGGTAT CTTTATAGTC CTGTGCGGTT TCGCCACCTC TGACTTGAGC
6901 GTCGATTTTT GTGATGCTCG TCAGGGGGG GGAGCCTATG GAAAAACGCC AGCAACGCGG
6961 CCTTTTTACG GTTCTGGCC TTTTGTGTC CTTTTGCTCA CATGTT

```

//

**pattB-RfB2 TEPI-GFP,3xP3-RFP (TEPI-GFP reporter)**

|              |                                        |         |     |          |         |
|--------------|----------------------------------------|---------|-----|----------|---------|
| LOCUS        | attBrf2_TEPI_GFP                       | 8929 bp | DNA | circular | 22-JUN- |
|              | 2016                                   |         |     |          |         |
| FEATURES     | Location/Qualifiers                    |         |     |          |         |
| misc_feature | complement(8288..8308)<br>/note="T7"   |         |     |          |         |
| misc_feature | complement(8314..8330)<br>/note=""     |         |     |          |         |
| misc_feature | complement(2216..2500)<br>/note="attB" |         |     |          |         |
| misc_feature | 2516..2523<br>/note="attR1"            |         |     |          |         |

```

misc_feature      2173..2192
                  /note="T3"
misc_feature      2138..2156
                  /note="M13R"
misc_feature      6609..6629
                  /note="attB3"
misc_feature      8244..8267
                  /note="attB2"
misc_feature      2516..2537
                  /note="attB1"
misc_feature      complement(5832..6551)
                  /note="GFP"
misc_feature      2547..2580
                  /note="FRT site"
misc_feature      5733..5754
                  /note="attB4"
gene              6677..6876
                  /note="sv40 terminator"
misc_feature      6919..6924
                  /note="EcoRI"
misc_feature      6997..7046
                  /note="3xP3 element"
misc_feature      7256..8181
                  /note="DsRed"
misc_feature      7086..7093
                  /note="TATA"
misc_feature      2617..5720
                  /note="TEP1 5' region"
misc_feature      5705..5720
                  /note="TEP1 5'UTR fragment"
source            1..8929
                  /dnas_title="attBrf2_TEP1_GFP_Sv40dsRED"

```

ORIGIN

```

   1 GTGGCACTTT TCGGGGAAAT GTGCGCGGAA CCCCTATTTG TTTATTTTTTC TAAATACATT
  61 CAAATATGTA TCCGTCATG AGACAATAAC CCTGATAAAT GCTTCAATAA TATTGAAAAA
 121 GGAAGAGTAT GAGTATTCOA CATTTCCGTG TCGCCCTTAT TCCCTTTTTTT GCGGCATTTT
 181 GCCTTCCTGT TTTTGCTCAC CCAGAAACGC TGGTGAAAGT AAAAGATGCT GAAGATCAGT
 241 TGGGTGCACG AGTGGGTAC ATCGAAGTGG ATCTCAACAG CGGTAAGATC CTTGAGAGTT
 301 TTCGCCCGA AGAACGTTTT CCAATGATGA GCACTTTTAA AGTTCCTGCTA TGTGGCGCGG
 361 TATTATCCCG TATTGACGCC GGGCAAGAGC AACTCGGTGC CCGCATAAC TATTCTCAGA
 421 ATGACTTGGT TGAGTACTCA CCAGTCACAG AAAAGCATCT TACGGATGGC ATGACAGTAA
 481 GAGAATTATG CAGTGCTGCC ATAACCATGA GTGATAACAC TGCGGCCAAC TTACTTCTGA
 541 CAACGATCGG AGGACCGAAG GAGCTAACCG CTTTTTTGCA CAACATGGGG GNATCATGTA
 601 ACTCGCCTTN GATCGTTGGG AACCGGAGCT GAATGAAGCC ATACCAAACG ACGAGCGTGA
 661 CACCACGATC CTTGTAGCAA TGGCAACAAC GTTGCGCAA CTATTAAC TGCGAACTACT
 721 TACTCTAGCT TCCCGGCAAC AATTAATAGA CTGGATGGAG GCGGATAAAG TTGCAGGACC
 781 ACTTCTGCGC TCGGCCCTTC CGGCTGGCTG GTTTATTGCT GATAAATCTG GAGCCGGTGA
 841 GCGTGGGTCT CGCGGTATCA TTGCAGCACT GGGGCCAGAT GGTAAGCCCT CCCGTATCGT
 901 AGTTATCTAC ACGACGGGGA GTCAGGCAAC TATGGATGAA CGAAATAGAC AGATCGCTGA
 961 GATAGGTGCC TCACTGATTA AGCATGGTGA ACTGTCAGAC CAAGTTTACT CATATATACT
1021 TTAGATTGAT TTAAACTTTC ATTTTTAAT TAAAAGGATC TAGGTGAAGA TCCTTTTTTGA
1081 TAATCTCATG ACCAAAATCC CTTAACGTGA GTTTTCGTT CACTGAGCGT CAGACCCCGT
1141 AGAAAAGATC AAAGGATCTT CTTGAGATCC TTTTTTCTG CGCGTAATCT GCTGCTTGCA
1201 AACAAAAAAA CCACCGCTAC CAGCGGTGGT TTGTTTGCCG GATCAAGAGC TACCAACTCT
1261 TTTTCCGAAG GTAAGTGGCT TCAGCAGAGC GCAGATACCA AATACTGTCC TTCTAGTGTA
1321 GCCGTAGTTA GGCCACCACT TCAAGAATC TGTAGACCG CCTACATACC TCGCTCTGCT
1381 AATCCTGTTA CCAGTGGCTG CTGCCAGTGG CGATAAGTCG TGTCTTACCG GGTTGGACTC

```

1441 AAGACGATAG TTACCGGATA AGGCGCAGCG GTCGGGCTGA ACGGGGGGTT CGTGCACACA  
1501 GCCCAGCTTG GAGCGAACGA CCTACACCGA ACTGAGATAC CTACAGCGTG AGCTATGAGA  
1561 AAGCGCCACG CTTCCCGAAG GGAGAAAGGC GGACAGGTAT CCGGTAAGCG GCAGGGTCGG  
1621 AACAGGAGAG CGCACGAGGG AGCTTCCAGG GGGAAACGCC TGGTATCTTT ATAGTCCTGT  
1681 CGGGTTTCGC CACCTCTGAC TTGAGCGTCG ATTTTTGTGA TGCTCGTCAG GGGGGCGGAG  
1741 CCTATGAAA AACGCCAGCA ACGCGGCCTT TTTACGGTTC CTGGCCTTTT GCTGGCCTTT  
1801 TGCTCACATG TTCTTTCCTG CGTTATCCCC TGATTCTGTG GATAACCGTA TTACCGCCTT  
1861 TGAGTGAGCT GATACCGCTC GCCGCAGCCG AACGACCGAG CGCAGCGAGT CAGTGAGCGA  
1921 GGAAGCGGAA GAGCGCCCAA TACGCAAACC GCCTCTCCCC GCGCGTTGGC CGATTCAATTA  
1981 ATGCAGCTGG CACGACAGGT TTCCCAGCTG GAAAGCGGGC AGTGAGCGCA ACGCAATTA  
2041 TGTGAGTTAG CTCACTCATT AGGCACCCCA GGCTTTACAC TTTATGCTTC CGGCTCGTAT  
2101 GTTGTGTGGA ATTGTGAGCG GATAACAATT TCACACAGGA AACAGCTATG ACCATGATTA  
2161 CGCCAAGCTC GAAATTAACC CTCACTAAAG GGAACAAAAG CTGGCTAGAA CTAGTGTCGA  
2221 CATGCCCGCC GTGACCGTCG AGAACCCGCT GACGCTGCCC CGCGTATCCG CACCCGCCGA  
2281 CGCCGTCGCA CGTCCCGTGC TCACCGTGAC CACCGCGCCC AGCGGTTTCG AGGGCGAGGG  
2341 CTTCCCGGTG CGCCGCGCGT TCGCCGGGAT CAACTACCGC CACCTCGACC CGTTCATCAT  
2401 GATGGACCAG ATGGGTGAGG TGGAGTACGC GCCCGGGGAG CCAAGGGCA CGCCCTGGCA  
2461 CCCGCACCGC GGCTTCGAGA CCGTGACCTA CATCGTCGAC ACTAGTGgat catcaacaag  
2521 tttGTACAAA AAAGCAGGCT GGTACCGAAG TTCTTATTCT CTAGAAAGTA TAGGAACTTC  
2581 GTCGACGGTA TCGATAAGCT tagggataac agggtaATGA CCATAGAACT TGCTGTATGG  
2641 AGATTGAACA GTAAACTTGA AATGCCGTCG GGGGCCCTT CGATTATCAG TCACAAATTT  
2701 TTGCTTTTTT TCTAAAATTT TTGCTGACGG TGGGGGTGGG GGGGTGCAAA TGATTACCA  
2761 GCTTCGGGGC CCCAACGGCC ATCCTTCCGG GGCCTTTGTC GCTAGTACTC TGTCGGTACG  
2821 GCATACTATT GATTGGTGAT CTACGGGGCC CCTATATCGG CGGGGCCCCA GGCGACCGCC  
2881 TAGTCCGCCT ACCGTTTCGAT TCGCCACTGC TTATGATTTT TGTTCTAGAC AACATTTTAA  
2941 AATGAAATTT GTCATAAATT TGCCTTATGT TGTTAGCTTA CAAATAAGTT TTGATCATAT  
3001 GTTTTTGTCA ATATGTATAT GTTTTGATCA ATTTGTTCTT CTTGGGTTTG CCGAACAAGT  
3061 TGCTTTGTCA TGCCGGCCTA TACAGGCTTT AGAGACTTAT TGGGTACCAC GACTCCGGAT  
3121 ACACGGTCCT TTGCTACAAG AGGTAGTCCA TACCAGATAT GAAATCATGA AGGGAATGTT  
3181 GTAAAGTCGC TGACGACTCA ATAACATGCT CTGAAATTGG GAAGAACCAA TGCCAAAGAT  
3241 GTGCAAATGA AAATAAAATA AATTATGTCA AAGATCCTCC AACATGTCAA GAATGCCAAA  
3301 GGATTGCATA TAAATTATAA GTTTGATGTT ACATTTGCTC AGAAAAATAT TCTCTGTAGA  
3361 ATGAATAATG TAGGTACTTT ATTTTGGGAC AGTGATATTT ATCAATTTTG AAAAAAAAAA  
3421 AAAGTTTTCT TGAAGCAAT TTCTCATTTT TGTCATGCTA TGGTACTACA CATTTCTAAG  
3481 CATATCACGA ACAATGTTTC AAAAAATAAA GCAGTACAAT AACTTCATTT TTCACGAAAA  
3541 AAAAAACAAA TGTTAAATTG TAAGTAGTGG GCACTTTATT TTGCCGGCCA CTGTATATCG  
3601 TATTTGTTAG CTGACAACAT AACGCAACTT TATGACAAGT TTCGTTTTTA AATGATGTCT  
3661 AGAACGTAAT TTATTAGGTT TTCAATCCAC GAATTTTCAA ACTCCCATAC AAAAAGTTGG  
3721 GCTTACTCGT GCAGGCGGTC GTAGAAATAC GTCGTTTTTT TGCGAGTAAG TTACAGTAGA  
3781 AAACAATATC AAAATTCCAG GAGAATATTG TTAGTGGAGA TGGAAGCATT GATAAAAATT  
3841 TCATGCATAT TAGACAAGCA GATAAAAAGG TATGAGCTTT TGAATCCTCA AAAATGTAAT  
3901 GTCTCATACA AAATATACGG TCCTACCCAG GTAGGCGGTC ATAGATGTAA AGGGGTGTGG  
3961 ATAGAGTTTG GAAGCACTGA AGATTACTAT GATGCATATC AAAGTAAGTA GTAGCTGGTC  
4021 TCGCGATACA GTCGTCATCT CGTACGACTT AACAAATGC CCATCATGGG TTCAAGCACC  
4081 GAATAGACCG TGCCCCATA CGTAAGACAG ACTATTCTAC TATGTGTAAT AAGTAAGTCA  
4141 CTGAAAACCG AGCAAAGTAA AGTAGTGGCA CAGGCACAAC GACAATCTTT GCGATAACGG  
4201 TTGTTGTGCC AAAGAAGAAG AAGAAGAAGA AGAAGAAGAT ATCAAAGTAT GTCCATTTTG  
4261 TCCCGCGTGC TCATTTTGCC CCGTGTTCCT TTA CTCTAGC GGAATCGTA TTTGGTTGAG  
4321 CTATCTTGCA AATAAGGTCG ACCATGCCAG AGTAACATGG GTTCGTAGCG AAGTGATCAA  
4381 CTGTTATCAA TGTTTTATAC GTTTCGCGTT TTCACCTTG TGTATAATAA TTGGAATCAA  
4441 ATCATATAAG ATGGTTTAGT ATGCACTTTC GAGCCAATTT AGTTTTTCTT TCATTTCACT  
4501 AATCTTTGCA GGCTTGGAGT TTAAAGAAAA AGTACTTTAA GGTATAAAAA AACCCAGCA  
4561 CAACATAAAT AATTGTAAGT TGTAAGATAG TGATTTGATA AACATGAAGC AAAACTGAAA  
4621 AACAATTGAA GCAATTTTTT CCAGATAAAT ATTTATCTTT TTGTTATTTA TTGATTAGAA  
4681 TTCAACAGAC CACTGCCTTC TTAAAGCGAA ACAAGGTCAC AAACATTTGA TACAGTCTCG  
4741 TTTCAAGTCAT CGTTTTTGCC GCGTTCAGTC AGAAACAAGT GTCCGTCAA CTTCTTCATC  
4801 TTCTTTTTTT ATTTCCAAAT CAATGGTTAA GGCATTTGCT GCATTCTATT TGCTAACCTT



4861 GTACATCATG TACGTATCTG TTCTGCATTG ATTAATTGCG TGGTCCATTT CATGTATATT  
4921 AATCCTTGCC AAATAGTTAA CCGAATCAAA AACACCAATT GAGTCCTTTT CACTTGATGC  
4981 GTTGATGGAT CAATTAACCT TTCGTACTGT TCGTTTCTAG AGAACTAACG GAGAACATAA  
5041 CATGACGTCT TCACACATTA CGGCTTACCA CAGGTAATAA TTTCACCCAG TACAATGCAA  
5101 ACGACTCACT AAGCATGTGT TTAANAATCAT TGTTTTGAAC CGTATCACAA GATTATTTAA  
5161 GAAATTTTCT TCAATAAAAA GCTACTCTTT AATTTTCGTGT TTACAAATAC TTCAGCAGAA  
5221 GAAATACAGA ATTGCAGAAA AATTAGCATG CTCGAAATAA CATCAAATA CTAATACTTA  
5281 TGTTTCTATA AGAGTTTACA ATGAGCAAAT AACAAATATA AACAAAATA TGTGTGATAA  
5341 AAGCAATACA GTAATCTATC AGTGAGCCAA AAAACTTACT ATGCAACAAG TTAATGCCAT  
5401 ACTGTTTAAT GGCAACCTAG GTTAAAAATC AAACATTAATA TTACTTTTGT TAAAGGTAATA  
5461 CTCTAGCAGG ATGTGCAGTT TTGCAAGCAT AAATACTGTT AACGCCTGC AATATTAGCC  
5521 ACTGGAATCG GTATTTCTAT ACAAACCAAG GGGATTTATT CTTATCGCCC GCGTTTCATG  
5581 CAGGTCGCTA TGTTTACAGT AACATCTGAG GGCAGGGAAT CCCCAATAAC AACAGCACAG  
5641 CTTACCGAT AGGGATGCAA ACTGACCGTG ATTCAGTTCA ATCGTAGACG GCATCCGAAG  
5701 CAGACGCGAA ATCGCACAAAC tagTCGAGCA CCCAACTTTT CTATACAAAG TTGGTACCGG  
5761 GCCCCCGCT AGCGTCGACG GTATCGATAA GCTTGATATC GAATTCGTTA ACAGATCCAC  
5821 CGGTCGCCAC CATGGTGAGC AAGGGCGAGG AGCTGTTTAC CGGGGTGGTG CCCATCCTGG  
5881 TCGAGCTGGA CGGCGACGTA AACGGCCACA AGTTCAGCGT GTCCGGCGAG GCGAGGGCG  
5941 ATGCCACCTA CGGCAAGCTG ACCCTGAAGT TCATCTGCAC CACCGGCAAG CTGCCCCTGC  
6001 CCTGGCCCAC CCTCGTGACC ACCCTGACCT ACGGCGTGCA GTGCTTCAGC CGCTACCCCG  
6061 ACCACATGAA GCAGCACGAC TTCTTCAAGT CCGCCATGCC CGAAGGCTAC GTCCAGGAGC  
6121 GCACCATCTT CTTCAAGGAC GACGGCAACT ACAAGACCCG CGCCGAGGTG AAGTTCGAGG  
6181 GCGACACCCT GGTGAACCGC ATCGAGCTGA AGGGCATCGA CTTCAAGGAG GACGGCAACA  
6241 TCCTGGGGCA CAAGCTGGAG TACAATAACA ACAGCCACAA CGTCTATATC ATGGCCGacA  
6301 AGCAGAAGAA CGGCATCAAG GTGAATTTCA AGATCCGCCA CAACATCGAG GaCGGCAGCG  
6361 TGCAGCTCGC CGACCACTAC CAGCAGAACA CCCCATCGG CGacGGCCCC GTGTCTGCTG  
6421 CCGaCAACCA CTACCTGAGC ACCCATCCG CCTGAGCAA agaCCCCAAC GAgaagCGCG  
6481 ATCACATGGT CCTGCTGgaG TTCGTGACCG CCGCCGGgat CactCTCGGC ATGgacGAgc  
6541 TGTacaAGTa AAqCgGCCgc GGcTcGAGGG tACCTctAGa GCGGCCGCCA CCGCGGTGGA  
6601 GCTCGAGACA ACTTTGTATA ATAAAGTTGG TACCGGGCCC CCCGCTAGCG TCGACGGTAT  
6661 CGATAAGCTT GATATCGAAT TCTCTAGATC ATAATCAGCC ATACCACATT TGTAGAGGTT  
6721 TTAATTTGCTT TAAAAACCT CCCACACCTC CCCCTGAACC TGAAACATAA AATGAATGCA  
6781 ATTTGTTGTTG TTAATTTGTT TATTGCAGCT TATAATGGTT ACAAATAAAG CAATAGCATC  
6841 ACAAATTTCA CAAATAAAGC ATTTTTCTTC ACTGCATTCT AGTTGTGGTT TGTCCAACT  
6901 CATCAATGTA TCAAGGGCGA ATTCCTGCAG CCCACTTCCG GTATCTCGCG TTTGTTTGAT  
6961 CGCACGGTTC CCACAATGGT TAATTCGAGC TCGCCCGGGG ATCTAATTTCA ATTAGAGACT  
7021 AATTCAATTA GAGCTAATTC AATTAGGATC CAAGCTTATC GATTTTGAAC CCTCGACCGC  
7081 CGGAGTATAA ATAGAGGCGC TTCGTCTACG GAGCGACAAT TCAATTTCAA CAAGCAAAGT  
7141 GAACACGTCG CTAAGCGAAA GCTAAGCAAA TAAACAAGCG CAGCTGAACA AGCTAAACAA  
7201 TCGGGGTACC GCTAGAGTCG ACGGTACCGC GGGCCCGGGA TCCACCGGTC GCCACCATGG  
7261 TGCGCTCCTC CAAGAAGTTC ATCAAGGAGT TCATGCGCTT CAAGGTGCGC ATGGAGGGCA  
7321 CCGTGAACGG CCACGAGTTC GAGATCGAGG GCGAGGGCGA GGGCCGCCCC TACGAGGGCC  
7381 ACAACACCGT GAAGCTGAAG GTGACCAAGG GCGGCCCCCT GCCCTTCGCC TGGGACATCC  
7441 TGTCCCCCA GTTCCAGTAC GGCTCCAAGG TGTACGTGAA GCACCCCGCC GACATCCCCG  
7501 ACTACAAGAA GCTGTCCTTC CCCGAGGGT TCAAGTGGGA GCGCGTGATG AACTTCGAGG  
7561 ACGGCGGCGT GGTGACCGTG ACCCAGGACT CCTCCCTGCA TCTCCCTGCA TTTATCTACA  
7621 AGGTGAAGTT CATCGGCGTG AACTTCCCCT CCGACGGCCC CGTAATGCAG AAGAAGACCA  
7681 TGGGCTGGGA GGCTCCACC GAGCGCCTGT ACCCCCGCGA CGGCGTGCTG AAGGGCGAGA  
7741 TCCACAAGGC CCTGAAGCTG AAGGACGGCG GCCACTACCT GGTGGAGTTC AAGTCCATCT  
7801 ACATGGCCAA GAAGCCCGTG CAGCTGCCCG GCTACTACTA CGTGGACTCC AAGCTGGACA  
7861 TCACCTCCCA CAACGAGGAC TACACCATCG TGGACCAGTA CGAGCGCACC GAGGGCCGCC  
7921 ACCACCTGTT CCTGTAGCGG CCGCGACTCT AGATCATAAT CAGCCATACC ACATTTGTAG  
7981 AGGTTTTACT TGCTTTAAAA AACCTCCCAC ACCTCCCCCT GAACCTGAAA CATAAAATGA  
8041 ATGCAATTGT TGTTGTTAAC TTGTTTATTG CAGCTTATAA TGGTTACAAA TAAAGCAATA  
8101 GCATCACAAA TTTTCAAAAT AAAGCATTTT TCTTCACTGC ATTCTAGTTG TGGTTTGTCC  
8161 AAACCTCATCA ATGTATCTTA AAGCTTATCG ATACGCGTAC GCGCGCCTA GAGCGGCCG  
8221 CACCGCGGTG GAGCTCGAGT ACCCAGCTTT cttgtacaaa gtggttgatC GGTACGTACC

```

8281 CAATTCGCCC TATAGTGAGT CGTATTACAA TTCACTGGCC GTCGTTTTTAC AACGTCGTGA
8341 CTGGGAAAAC CCTGGCGTTA CCCAACTTAA TCGCCTTGCA GCACATCCCC CTTTCGCCAG
8401 CTGGCGTAAT AGCGAAGAGG CCCGCACCGA TCGCCCTTCC CAACAGTTGC GCAGCCTGAA
8461 TGGCGAATGG AAATTGTAAG CGTTAATATT TTGTTAAAAT TCGCGTTAAA TTTTTGTTAA
8521 ATCAGCTCAT TTTTAAACCA ATAGGCCGAA ATCGGC AAAA TCCCTTATAA ATCAAAAAGAA
8581 TAGACCGAGA TAGGGTTGAG TGTGTGTCCA GTTTGGAACA AGAGTCCACT ATTAAAGAAC
8641 GTGGACTCCA ACGTCAAAGG GCGAAAAACC GTCTATCAGG GCGATGGCCC ACTACGTGAA
8701 CCATCACCCCT AATCAAGTTT TTTGGGGTCG AGGTGCCGTA AAGCACTAAA TCGGAACCCT
8761 AAAGGGAGCC CCCGATTTAG AGCTTGACGG GGAAAGCCGG CGAACGTGGC GAGAAAAGGAA
8821 GGGAAAGAAAG CGAAAGGAGC GGGCGCTAGG GCGCTGGCAA GTGTAGCGGT CACGCTGCGC
8881 GTAACCACCA CACCCGCCGC GCTTAATGCG CCGCTACAGG GCGCGTCAG

```

//

**pattB-RfB2-Vg-TEP1r SV40YFP (line *Vg-TEP1r*)**

```

LOCUS      pattB-RfB2-VgTEP      10653 bp      DNA      circular      21-JUN-
2016
FEATURES             Location/Qualifiers
  misc_feature       complement(2216..2500)
                     /note="attB"
  misc_feature       2563..4264
                     /note="Vitellogenin promoter"
  promoter          4372..8372
                     /note="ORF TEP1r"
  misc_feature       8472..8671
                     /note="sv40 terminator"
  gene              8980..9696
                     /note="EYFP (Clontech) "
  misc_feature       9703..9957
                     /note="SV40 term sequences"
  misc_feature       8720..8928
                     /note="3xP3-hsp70 promoter"
  source            1..10653
                     /dnas_title="pattB-RfB2-VgTEP1rSV40YFP"
ORIGIN
   1  GTGGCACTTT  TCGGGGAAAT  GTGCGCGGAA  CCCCTATTTG  TTTATTTTTT  TAAATACATT
  61  CAAATATGTA  TCCGCTCATG  AGACAATAAC  CCTGATAAAT  GCTTCAATAA  TATTGAAAAA
 121  GGAAGAGTAT  GAGTATTCAA  CATTTCCGTG  TCGCCCTTAT  TCCCTTTTTT  GCGGCATTTT
 181  GCCTTCCTGT  TTTTGCTCAC  CCAGAAACGC  TGGTGAAAGT  AAAAGATGCT  GAAGATCAGT
 241  TGGGTGCACG  AGTGGGTTAC  ATCGAACTGG  ATCTCAACAG  CGGTAAGATC  CTTGAGAGTT
 301  TTCGCCCCGA  AGAACGTTTT  CCAATGATGA  GCACTTTTAA  AGTTC TGCTA  TGTGGCGCGG
 361  TATTATCCCG  TATTGACGCC  GGGCAAGAGC  AACTCGGTCT  CCGCATAAC  TATTCTCAGA
 421  ATGACTTGGT  TGAGTACTCA  CCAGTCACAG  AAAAGCATCT  TACGGATGGC  ATGACAGTAA
 481  GAGAATTATG  CAGTGTCTGC  ATAACCATGA  GTGATAACAC  TGCGGCCAAC  TTACTTCTGA
 541  CAACGATCGG  AGGACCGAAG  GAGCTAACCG  CTTTTTTGCA  CAACATGGGG  GNATCATGTA
 601  ACTCGCCTTN  GATCGTTGGG  AACC GGAGCT  GAATGAAGCC  ATACCAAAC  ACGAGCGTGA
 661  CACCACGATG  CCTGTAGCAA  TGGCAACAAC  GTTGC GCAA  CTATTAAC  TGCAGACTACT
 721  TACTCTAGCT  TCCCGGCAAC  AATTAATAGA  CTGGATGGAG  GCGGATAAAG  TTGCAGGACC
 781  ACTTCTGCGC  TCGGCCCTTC  CGGCTGGCTG  GTTTATTGCT  GATAAATCTG  GAGCCGGTGA
 841  GCGTGGGTCT  CGCGGTATCA  TTGCAGCACT  GGGGCCAGAT  GGTAAGCCCT  CCCGTATCGT
 901  AGTTATCTAC  ACGACGGGGA  GTCAGGCAAC  TATGGATGAA  CGAAATAGAC  AGATCGCTGA
 961  GATAGGTGCC  TCACTGATTA  AGCATTGGTA  ACTGTCAGAC  CAAGTTTACT  CATATATACT
1021  TTAGATTGAT  TTAAAAC TTC  ATTTTTAATT  TAAAAGGATC  TAGGTGAAGA  TCCTTTTTTG
1081  TAATCTCATG  ACCAAAATCC  CTTAACGTGA  GTTTTCGTT  CACTGAGCGT  CAGACCCCGT

```

1141 AGAAAAGATC AAAGGATCTT CTTGAGATCC TTTTTTTCTG CGCGTAATCT GCTGCTTGCA  
1201 AACAAAAAAA CCACCGCTAC CAGCGGTGGT TTGTTTGCCG GATCAAGAGC TACCAACTCT  
1261 TTTTCCGAAG GTAACGGCT TCAGCAGAGC GCAGATACCA AATACTGTCC TTCTAGTGTA  
1321 GCCGTAGTTA GGCCACCACT TCAAGAATC TGTAGCACCG CCTACATACC TCGCTCTGCT  
1381 AATCCTGTTA CCAGTGGCTG CTGCCAGTGG CGATAAGTCG TGTCTTACCG GGTTGGACTC  
1441 AAGACGATAG TTACCGGATA AGGCGCAGCG GTCGGGCTGA ACGGGGGGTT CGTGCACACA  
1501 GCCCAGCTTG GAGCGAACGA CCTACACCGA ACTGAGATAC CTACAGCGTG AGCTATGAGA  
1561 AAGCGCCACG CTCCCCGAAG GGAGAAAGGC GGACAGGTAT CCGGTAAGCG GCAGGGTCGG  
1621 AACAGGAGAG CGCACGAGGG AGCTTCCAGG GGGAAACGCC TGGTATCTTT ATAGTCTGT  
1681 CGGGTTTCGC CACCTCTGAC TTGAGCGTCG ATTTTTGTGA TGCTCGTCAG GGGGGCGGAG  
1741 CCTATGGAAA AACGCCAGCA ACGCGGCCCTT TTTACGGTTC CTGGCCTTTT GCTGGCCTTT  
1801 TGCTCACATG TTCTTTCCTG CGTTATCCCC TGATTCTGTG GATAACCGTA TTACCGCCTT  
1861 TGAGTGAGCT GATACCGCTC GCCGCAGCCG AACGACCGAG CGCAGCGAGT CAGTGAGCGA  
1921 GGAAGCGGAA GAGCGCCAA TACGCAAACC GCCTCTCCCC GCGCGTTGGC CGATTCAATTA  
1981 ATGCAGCTGG CACGACAGGT TTCCCGACTG GAAAGCGGGC AGTGAGCGCA ACGCAATTA  
2041 TGTGAGTTAG CTCACTCATT AGGCACCCCA GGCTTTACAC TTTATGCTTC CGGCTCGTAT  
2101 GTTGTGTGGA ATTGTGAGCG GATAACAATT TCACACAGGA AACAGCTATG ACCATGATTA  
2161 CGCCAAGCTC GAAATTAACC CTCACTAAAG GGAACAAAAG CTGGCTAGAA CTAGTGTCTGA  
2221 CATGCCCGCC GTGACCGTCG AGAACCCGCT GACGCTGCC CGCGTATCCG CACCCGCCGA  
2281 CGCCGTCGCA CGTCCCGTGC TCACCGTGAC CACCGCGCCC AGCGGTTTTCG AGGGCGAGGG  
2341 CTCCCCGGTG CGCCGCGCGT TCGCCGGGAT CAACTACCGC CACCTCGACC CGTTCATCAT  
2401 GATGGACCAG ATGGGTGAGG TGGAGTACGC GCCCGGGGAG CCCAAGGGCA CGCCCTGGCA  
2461 CCCGCACCGC GGCTTCGAGA CCGTGACCTA CATCGTCGAC ACTAGTGgat catcaacaag  
2521 tttGTACAAA AAAGCAGGCT GGTACCGGGC CCCCCGCTAG CGTCGAGTTC AACTCGACCA  
2581 TAATAATTGA TCCGTCAATC CATATTGGTC CGCAATAATG AAAGTTGCAA GAGTACGACG  
2641 GTATGAAAAG AGGTTCAGTA AGTTGTAAC TAATAGTTTC TTCCAACGT TCAAATGCTG  
2701 GCAAATCTTT TCGCGGGCCG CACTTCGTCG ATCGCTAGTC TTAATGATAA TTTCTGAGAA  
2761 AAAGTCTCTA CTGCATCTAC TATATTCTAC TGGATATAAA TGAATAACA ACGTGAAGCT  
2821 CAACCTACAAC ATGTAATTTA TTGATGGTTT AGTTTAACCA ACCTATGAAA TAATTTGATA  
2881 TAGAAATTTG TAGTCGTTTT TCTATGAAGT AAAATTCTAA AATCAAACAT TAAACTGTTT  
2941 TGTAGTACCC GGACTCATGG TATGGCTTCT ATTAGCCGTA AACAAAGATT TACAATTGAC  
3001 TAAGGTTAGG TCCGACACTG TAGGAGCCAG CGCGTCCTTT CAATACATCA ACGGACCATC  
3061 TCGTGTGTGT AAATACTTAT TATTATTATG GTTTGCTAAT TGATATGTTT CAAGACCGAT  
3121 TTGGATTTTC AAATAAGTAT TCTCTGATTC ATTTTGGGAG CCGGTCTCGT GATACAGTCG  
3181 TCAGCCCGTA CGACTTAAC ACATTCTCGT CATGGGTTC AAGCCCCAGAT GGACCGTGCC  
3241 GCCATACGTA GAGTCAGTCC TATCCTGTTA TGGGGGGTAA TACATAAGAC ACTGAAAGCC  
3301 AACCCACAA GTGGTACAGA CAAGCCTTGa CCGACAATTG TTGTTGAGCC AAACAGAAGA  
3361 AGAATCCATT TCGGGAAATG ATTTTATCAT TCAATCAAAC CAGTCAATCA TAAACATCAT  
3421 AGTTTTAAAT ACTCAAACCT AGTTGAGATC TTTAAAACAC ATTATTTTATG TTTAATTA  
3481 TGATCTGTTA GCTAGAAGGT AGATACGATA TTTTAGACAT TTCGTAATAG ATCGCAAATC  
3541 TCTATTATGT TGGTAATTCA CTTCGTAATA CTCTTAGGCA AAACCTCTTAT TAGTAAACAA  
3601 AATACTAATC AAACACTGAT AAACCTAACGC GATTTATACA TTGGACAAAG AAGAGGCTGA  
3661 TTTTAAAAAT ACTCGCTTTA AAATTGCTT CATTCATCAA TGTATTGTAA AGCACATAAA  
3721 GAACACAATC ATTGACTGAA AACAAATCCA CGTCTCAGCC AACTTCCAG ATCAATGAAA  
3781 TAGCAAGTTC CAAGTCCAT TTCATTGATT ATGGTAACTA CTGATTATTT TCAATAACAA  
3841 ATACTTCGAA GACTGCACAA TTCAAAAGTA TGCCAGAAAG AAAGGATTAC TATCAATTGT  
3901 GGGTTAATCA AACTAAGACA GGTGGCAAAA ATGGAACCAT TGATTAAGGC AGCCACTGAC  
3961 CGATTTCAAT TAAAAACAC ACTCTTGGAA GTTCCACAC AATCTCACCT TTTGCCAATT  
4021 TTAGCAAAGA CGTTGTGCTG CACTGATAAG AATCGAACTG TAAACATGTG GGCAGTAAAA  
4081 ATTATTTTAT CGTTCAACAC GGCGGTCATT ACACTATTCG AAGCAGCTGA AAAGATTTGA  
4141 TGATAGCAGG ACCGTGAGAT CAGCAAATTT GAGGTATAAA AGATGATCCT GCGACCACCA  
4201 GAAGGCACAT TCGAGCTTTG GAGTGCATTC AAAGCATCCG GGCAACTGCG AACAACCGAA  
4261 CCatCGATCT CGAGCACCCA ACTTTTCTAT ACAAAGTTGG TACCGGGCCC CCCGCTAGCG  
4321 TCGACGGTAT CGATAAGCTT GATATCGAAT TCCTGCAGCC CGGGGGATCC AATGTGGCAG  
4381 TTCATAAGGT CACGAATATT AACGGTGATA ATCTTCATAG GTGCTGCTCA TGGGCTACTG  
4441 GTTGTGGGTC CGAAATTTAT ACGGGCCAAC CAGGAATACA CTCTGGTGAT CAGCAACTTT  
4501 AACTCACAGC TAAGCAAAGT GGACCTGCTG TTTAAACTGG AAGGCGAAAC TGATAATGGT

4561 TTAAGCGTTC TGAACGTTAC CAAGATGGTT GACGTGCGAC GTAATATGAA CCGAATGATC  
4621 AACTTCAATA TGCCTGAGGA TCTGACGGCT GGAAACTACA AAATAACTAT CGATGGACAG  
4681 CGTGGCTTCA GCTTTCACAA GGAGGCAGAG CTGGTGTATC TCAGCAAATC GATATCGGGG  
4741 CTAATACAGG TCGATAAGCC CGTATTTAAA CCTGGGGATA CGGTGAAC TT CCGTGTGATC  
4801 GTGCTGGACA CGGAGCTGAA ACCGCCGGCG AGGGTCAAGT CCGTTTATGT AACTATACGA  
4861 GATCCTCAGC GCAATGTGAT TCGCAAATGG TCCACGGCAA AACTGTATGC CGGTGTGTTC  
4921 GAGAGCGATC TACAGATAGC GCCTACTCCA ATGCTCGGGG TCTGGAATAT CTCGGTGGAG  
4981 GTGGAAGGAG AAGAGCTTGT GTCAAAGACG TTTGAGGTGA AGGAGTACGT GTTGTCAACG  
5041 TTCGACGTGC AGGTCATGCC ATCGGTGATT CCACTGGAAG AGCATCAAGC TGTGAATCTT  
5101 ACAATCGAAG CGAACTATCA CTTTGGTAAG CCAGTGCAAG GAGTGGCCAA GTTGGAGCTG  
5161 TACCTAGACG ACGATAAGCT AAAACTGAAA AAAGAGCTGA CTGTGTACGG AAAGGGCCAG  
5221 GTAGAGTTGC GCTTTGACAA TTTTGCAATG GATGCGGATC AGCAGGATGT ACCAGTGAAG  
5281 GTGTCGTTTCG TCGAGCAGTA CACAAATCGT ACGGTGGTCA AACAGTCACA AATCACGGTA  
5341 TATAGGTATG CGTACCGAGT AGAGTTGATA AAAGAGAGTC CACAGTTTCG TCCGGGACTC  
5401 CCGTTCAAAT GTGCGCTTCA GTTTACACAC CATGATGGAA CACCGGCTAA AGGCATTAGC  
5461 GGTAAGGTAG AGGTATCCGA TGTACGATTC GAAACGACAA CAACGAGTGA TAACGATGGA  
5521 TTGATTAAGC TCGAGCTGCA ACCAAGTGAG GGTACTGAAC AACTCAGTAT TCACTTCAAT  
5581 GCTGTTGATG GATTCTTTTT TTATGAAGAT GTGAATAAGG TAGAAACGGT TACGGATGCG  
5641 TATATTA AAC TGGAGCTGAA ATCACC CATC AAACGGAACA AATTGATGCG TTTTCATGGTG  
5701 ACGTGCACGG AGCGCATGAC ATTCTTCGTG TACTATGTCA TGTCAAAGGG CAATATCATC  
5761 GATGCAGGAT TCGTGCAGC CAACAAGCAA CCGAAGTACC TGTTCAGCT GAACGCAACA  
5821 GAAAAGATGA TTCCGAGGGC GAAAATTCTC ATCGCTACCG TAGCGGGCCG CACGGTGGTG  
5881 TACGACTTCG CAGACCTCGA TTTCCAAGAG CTTCGCAATA ATTTTGATTT AAGCATTGAC  
5941 GAGCAAGAGA TCAAGCCGGG ACGACAAATC GAGCTGAGCA TGTCTGGACG CCCAGGAGCG  
6001 TACGTTGGGC TGGCCGCGTA TGACAAAGCC TTGCTGCTTT TCAACAAGAA CCACGACCTG  
6061 TTCTGGGAG ACATTGGGCA GGTGTTTGT GGGTTCATG CAATCAATGA GAACGAGTTT  
6121 GACATATTC ACAGCTGGG TCTGTTCCGC AGGACATTTG ACGATATCTT GTTCGACAGT  
6181 GCAAATGAAA AGACGGGGCG TAATGCATG CAGTCAGGCA AGCCGATCGG CAATGGTGTG  
6241 TCGTATCGGA CGAACTTCCA GGAATCGTGG TTGTGGAAAA ATGTTTCCAT CGGACGATCG  
6301 GGAAGTCGCA AGTTGATCGA GGTAGTACCG GACACGACCA CCTCCTGGTA TCTGACGGGC  
6361 TTCTCGATCG ATCCCCTGTA CGGGTTGGGT ATCATCAAGA AGCCAATCCA GTTCACAACA  
6421 GTCCAGCCGT TCTACATCGT AGAGAACTTA CCATATTC AA TCAAACGAGG CGAAGCGGTT  
6481 GTGTTGCAGT TTACGCTGTT CAACAACCTT GGAGCGGAGT ATATAGCCGA TGTGACGCTG  
6541 TACAATGTGG CCAACCAGAC CGAGTTCGTC GGACGTCCAA ATACGGATCT CAGCTACACC  
6601 AAATCCGTGA GCGTTCCTCC AAAAGTTGGT GTGCCAATCT CGTTCCTCAT CAAGGCCCGC  
6661 AAGCTCGGCG AGATGGCGGT TCGTGTA AAG GCTTCGATAA TGCTGGGACA CGAAACGGAC  
6721 GCCCTG GAAA AGGTAATACG GGTGATGCCT GAAAGTTTGG TGCAGCCGAG AATGGATACA  
6781 CGTTTTTCT GCTTCGACGA TCACAAAAAT CAAACGTTTC CGATCAACTT GGACATCAAC  
6841 AAGAAGGCCG ACAGTGGATC GACAAAGATT GAGTTTCGAC TAAATCCCAA TTTGTTGACC  
6901 ACGGTCATCA AGAACCTGGA CCATCTTCTC GGCGTTCCGA CGGGATGTGG TGAGCAGAAT  
6961 ATGGTCAAAT TTGTTCCCAA CATTTTGGTA CTGGATTATT TGCATGCCAT CGGGTCGAAA  
7021 GAACAGCATC TAATCGACAA AGCTACGAAT TTGTTGCGTC AAGGATATCA AAACCAGATG  
7081 CGCTACCGTC AGACGGATGG TTCATTTGGT TTGTGGGAGA CTACTAATGG TAGCGTGT TT  
7141 CTCACCGCGT TCGTTGGCAC ATCGATGCAA ACTGCAGTAA AATACATAAG CGATATTGAT  
7201 GCAGCAATGG TGGAGAAGG ATTGGATTGG TTAGCCTCGA AGCAGCATT CTCTGGGACGG  
7261 TTTGACAAGG CCGGTGCAGA GTATCACAAA GAAATGCAAG GAGGGTTGCG CAATGGTGTG  
7321 GCCCTCACAT CATATGTGTT GATGGCATTTG CTGGAGAATG ACATTGCCAA AGCAAAGCAC  
7381 GCAGAGGTGA TTCAAAAAGG AATGACCTAT CTGAGCAATC AGTTTGGATC CATCAACAAT  
7441 GCATACGACC TATCGATAGC AACCTACGCG ATGATGTTGA ACGGACACAC CATGAAGGAG  
7501 GAGGCACTCA ATAAGCTGAT TGATATGTCT TTCATTGATG CTGATAAAAA CGAACGGTTC  
7561 TGGAACACAA CGAATCCAAT AGAAACCACC GCATATGCTC TGCTGTCGTT TGTGATGGCC  
7621 GAGAAGTACA CAGACGGTAT ACCGGTCATG AATTGGTTGG TGAATCAACG TTACGTTACC  
7681 GGTAGCTTTC CGAGCACGCA AGACACGTTT GTGGGGCTGA AAGCGCTGAC CAAAATGGCG  
7741 GAAAAGATAT CTCCGTCCCG AAACGACTAC ACCGTTCAAC TGAAGTACAA GAAGAGTGCA  
7801 AAATACTTCA AAATAAACTC GGAGCAAATT GATGTG GAAA ACTTCGTGGA TATACCGGAG  
7861 GACACAAAAA AGCTCGAGAT CAATGTGGGG GGCATTGGAT TTGGGTTGTT AGAGGTGGTT  
7921 TATCAATTTA ATTTGAATCT CGTCAACTTT GAGAATAGAT TCCAAC TAGA CCTGGAGAAA

7981 CAGAACACAG GCTCTGACTA CGAGCTGAGG CTGAAGGTCT GTGCCAGCTA CATACCCAG  
8041 CTGACCGACA GACGATCGAA CATGGCACTG ATTGAGGTAA CCTTACCGAG CGGTTACGTG  
8101 GTTGATCGCA ATCCGATCAG CGAGCAGACG AAGGTGAATC CGATTGAGAA AACTGAAATC  
8161 CGTTACGGTG GCACTTCAGT CGTTTTATAC TACGACAATA TGGGCAGCGA GCGTAACTGT  
8221 TTCACCCTGA CCGCGTACAG ACGCTTTAAG GTCGCATTGA AGCGTCCAGC GTATGTGGTT  
8281 GTGTATGATT ATTATAATAC AAATCTGAAC GCCATCAAAG TGTACGAAGT GGACAAGCAG  
8341 AATTTGTGCG AAATCTGTGA CGAAGAAGAC TGtcctGCAG AGTGCAAGAA ATAGTCctcG  
8401 AGACAACATTT GTATAATAAA GTTGGTACCG GGCCCCCGC TAGCGTCGAC GGTATCGATA  
8461 AGCTTGATAT CGAATTCTCT AGATCATAAT CAGCCATACC ACATTTGTAG AGGTTTACT  
8521 TGCTTTAAAA AACCTCCAC ACCTCCCCCT GAACCTGAAA CATAAAATGA ATGCAATTGT  
8581 TGTTGTTAAC TTGTTTATTG CAGCTTATAA TGGTTACAAA TAAAGCAATA GCATCACAAA  
8641 TTTCACAAAT AAAGCATTTT TCTTACTGC ATTCTAGTTG TGGTTTGTCC AAACTCATCA  
8701 ATGTATCAAG GGCGAATTCG GGGATCTAAT TCAATTAGAG ACTAATTCAA TTAGAGCTAA  
8761 TTCAATTAGG ATCCAAGCTT ATCGATTTTCG AACCCCTCGAC CGCCGGAGTA TAAATAGAGG  
8821 CGCTTCGTCT ACGGAGCGAC AATTCAATTC AAACAAGCAA AGTGAACACG TCGCTAAGCG  
8881 AAAGCTAAGC AAATAAACAA GCGCAGCTGA ACAAGCTAAA CAATCGGGGT ACCGCTAGAG  
8941 TCGACGGTAC CGCGGGCCCG GGATCCACCG GTCGCCACCA TGGTGAGCAA GGGCGAGGAG  
9001 CTGTTACCCG GGGTGGTGCC CATCCTGGTC GAGCTGGACG GCGACGTAAA CGGCCACAAG  
9061 TTCAGCGTGT CCGGCGAGGG CGAGGGCGAT GCCACCTACG GCAAGCTGAC CCTGAAGTTC  
9121 ATCTGCACCA CCGGCAAGCT GCCCGTGCCC TGGCCCACCC TCGTGACCAC CTTCGGCTAC  
9181 GGCCTGCAGT GCTTCGCCCC CTACCCCGAC CACATGAAGC AGCACGACTT CTTCAAGTCC  
9241 GCCATGCCCG AAGGCTACGT CCAGGAGCGC ACCATCTTCT TCAAGGACGA CGGCAACTAC  
9301 AAGACCCGCG CCGAGGTGAA GTTCGAGGGC GACACCCTGG TGAACCGCAT CGAGCTGAAG  
9361 GGCATCGACT TCAAGGAGGA CGGCAACATC CTGGGGCACA AGCTGGAGTA CAACTACAAC  
9421 AGCCACAACG TCTATATCAT GGCCGACAAG CAGAAGAACG GCATCAAGGT GAACTTCAAG  
9481 ATCCGCCACA ACATCGAGGA CCGCAGCGTG CAGCTCGCCG ACCACTACCA GCAGAACACC  
9541 CCCATCGCG ACGGCCCCGT GCTGCTGCC GACAACCCT ACCTGAGCTA CCAGTCCGCC  
9601 CTGAGCAAAG ACCCCAACGA GAAGCGGAT CACATGGTCC TGCTGGAGTT CGTGACCGCC  
9661 GCCGGGATCA CTCTCGGCAT GGACGAGCTG TACAAGTAAA GCGGCCCGCA CTCTAGATCA  
9721 TAATCAGCCA TACCACATTT GTAGAGGTTT TACTTGCTTT AAAAAACCTC CCACACCTCC  
9781 CCCTGAACCT GAAACATAAA ATGAATGCAA TTGTTGTTGT TAACTTGTTT ATTGCAGCTT  
9841 ATAATGGTTA CAAATAAAGC AATAGCATCA CAAATTTAC AAATAAAGCA TTTTTTTCAC  
9901 TGCATTCTAG TTGTGGTTTG TCCAAACTCA TCAATGTATC TTAAAGCTTA TCGATAcctc  
9961 gagTACCCAG CTTTcttgta caaagtgggt gatCGGTACG TACCCAATTC GCCCTATAGT  
10021 GAGTCGTATT ACAATTCCTT GGCCGTCGTT TTACAACGTC GTGACTGGGA AAACCCCTGGC  
10081 GTTACCCAAC TTAATCGCCT TGCAGCACAT CCCCCTTTCG CCAGCTGGCG TAATAGCGAA  
10141 GAGGCCCGCA CCGATCGCCC TTCCAACAG TTGCGCAGCC TGAATGGCGA ATGGAAATTG  
10201 TAAGCGTTAA TATTTTGTTA AAATTCGCGT TAAATTTTTG TTAAATCAGC TCATTTTTTA  
10261 ACCAATAGGC CGAAATCGGC AAAATCCCTT ATAAATCAAA AGAATAGACC GAGATAGGGT  
10321 TGAGTGTGTT TCCAGTTTGG AACAAGAGTC CACTATTTAA GAACGTGGAC TCCAACGTCA  
10381 AAGGGCGAAA AACCCTCTAT CAGGGCGATG GCCCACTACG TGAACCATCA CCCTAATCAA  
10441 GTTTTTTGGG GTCGAGGTGC CGTAAAGCAC TAAATCGGAA CCCTAAAGGG AGCCCCCGAT  
10501 TTAGAGCTTG ACGGGGAAAG CCGGCGAACG TGGCGAGAAA GGAAGGGAAG AAAGCGAAAG  
10561 GAGCGGGCGC TAGGGCGCTG GCAAGTGTAG CGGTCACGCT GCGCGTAACC ACCACACCCG  
10621 CCGCGCTTAA TGCGCCGCTA CAGGGCGCGT CAG

//

## Promoter sequences:

### Lp promoter

ATCCagcttgccgggaagacacattcgagatacctaagtgattgagcgattacgatctagcaaaacatacgttcagct  
gtgagaataatcatccatcttctgcaatgagcagttcattcccgattgagggattttattccccggggccttttcaaacggct  
aatataagcaattaatagtatTTTTCTTcaggttagttactgtaatgggtgaattgtcatcttacacctccgtctgataagagatta  
cgaagctcagatgatgaaataaataagataaatttatttaaaaaagaacaattgctatgagagtgaatacaacagtgcc  
gttcacaatattcgaaaaacaataaaattaaaaaaaaaacaagaaacattcacaacatatcaatctgcttcatcgac  
accgaactgctagcctccccagcttaaccgcggtggggacggttaattgctttgtctcgaccccggtcaaacatacacttc  
ggacctgtccgaacccccactgtgatccctagctcgtcatcatcattgccggcatcatgtaagcgtgcattatttcacaact  
tagcgtaatgctagcgtgctgtagcaaaaactcggccgagactcgtcacagcaccggtacgatcgatcgttaccggtc  
ccttccccgatcgggtggctgcgataccgtgtccgggtagaaaactcccctttacacacacacactcacatacacacag  
agctgaatagcaacttacctatctgttcgtcatcgctcgggcggatctggacgaatcttcgcaccgataaccatgtggatcta  
cgacctcggcttggtgtctctgtctatgtgtatgtctgtgtgtgtatgtgagcttctccctcaaaccctcgatctcgctgt  
gscaacaatcaaacgtgcaagtgcaaacattgcacccccattgattatacacccaacaccaaccaattccccttgccggagg  
catctctgtgctcggcagcatgtttaccgagatctacagagaactcaattgaggtcctttccacccccagccctcaaccgg  
caatccggcagccactggatcatcagcgaagagagagagagcagagcagaacagaggtgaccaactgtggtatcg  
cttcccgcgccgggtgtgtgggtgtccatttcgggtgatcgcgatcccggccgttccagcaccgtccaccgatcagtcaca  
aaacgctctcaaacccttatcagcaccgtcgtgatgtgaacccccgtcaaaccccaatgcagtgttgtattgctgtg  
tgtatgttacgtgcgtgtgtgtgaaattctataaaagtaggcacccgtggccgggatccgttattcccgtcctgaggcccc  
cccgggatcgtggtgacgacagacgagccgctgtgtgacgtacgtagtgcccgatcggtaaagagtgaaaccgttctct  
gcagtgtaggagagaacggttcatcttttcgcccacaccccccggttacattccatgtgaactgtaaggcttagtgaaca  
ttcctgagtggtgaaagtgtggttagtgcgtgagagtgacggacacgac**TATG**

### Vg promoter

ATCCcgctagcgtcgagttcaactcgaccataataattgatccgtcaatccatattggtccgcaataatgaaagttgcaag  
agtacgacggatgaaaagaggttcagtaagttgtaaactaatagtttctcccaacggtcaaagtctggcaaatctttcgcg  
ggccgacttcgtcgatcgctagcttaatgataatttctgagaaaaaggtgctactgcatctactataattctactggatataat  
gaaataacaacgtgagactcacctacaacatgtaatttattgatggttagtttaaccaacctatgaaataattgatatagaa  
atgttagtcgtttctatgaagtaaaattctaaaatcaaacattaaactgtttgtagtaccggactcatggtatggcttctatta  
gccgtaaaaaagatttacaattgactaaggttaggtccgacactgtaggagccagcgcgtcctttcaatacatcaacgga  
ccatctcgtgtgttaaaataacttattattatggttgctaattgatatttccaagaccgatttgatttcgaaataagattctctg  
attcattttgggagccggtctcgtgatacagtcgtcagcccgtacgacttaactacattctcgtcatgggttcaagccccagat  
ggaccgtgccccatacgtagagtcagtcctatcctgttatgggggtaatacataagacactgaaagccaacccccaca  
gtggtacagacaagccttgaccgacaattgtgttgagccaaacagaagaagaatccatttcgggaaatgatttatcattc  
aatcaaaccagtcataaacaatcatagtttaataactcaaaactagttgagatctttaaacaacatttttagtttaatta  
aatgatctgttagctagaaggtagatacgaattttagacatttcgtaatagatcgcaaatctctattatgttggaattcactcgt  
aaaactcttaggcaaaactcttattagtaaaaaataactaatcaaacactgataaactaacgcgattatacattggacaa  
agaagaggctgattttaaataactcgtctttaaattgtcttcatcaatgtattgtaaagcacataaagaacacaatcatt  
gactgaaaacaattccagctcagccaactccaggatcaatgaaatagcaagttccaagttccatttcattgattatgga  
actactgatttttcaatacaaaatactcgaagactgcacaattcaaaagtatgccagaaagaaaggattactatcaattg  
tgggttaatacaactaagacaggtggcaaaaatggaaccattgattaaggcagccactgaccgatttcatttaaaaaaca  
cactcttgaagttccacacaatctcacctttgccaatttagcaagacggtgtgctgactgataagaatcgaactgtaa  
acatgtgggcagtaaaaattttcatcgttcaacacggcggtcattacactattcgaagcagctgaaaagatttgatgatg  
caggaccgtgagatcagcaaaatttgaggtataaaagatgatcctgcgaccaccagaaggcacattcgagctttggagtg  
attcaaagcatccgg

## TEP1 minimal promoter

tccggatgtgcagtttgcaagcataaatactgttaacgcactgcaatattagccactggaatcggtatttctatacaaaccaa  
ggggatttattcttctatcgcccggcgttcatgcaggtcgctatgtttacagtaacatctgagggcaggggaatccccataaaca  
cagcacagcttaccgatagggatgcaaactgaccgtgattcagttcaatcgtagacggcatccgaagcagacgcgaaa  
tcgacaacgtccaatccaacc

## TALE sequences:

N terminal domain (start codon is in bold, *Bsal* overhangs are capitalized):

**TATG**ccaagaagaagaggaaggtgcaggtggatctacgcacgctcggctacagccagcagcaacaggagaaga  
tcaaaccgaaggttcggtcgacagtggcgcagcaccacgaggcactggtcggccatgggtttacacacgcgcacatcgtt  
gcgctcagccaacacccggcagcgttagggaccgtcgtgtcaagtatcaggacatgatcgacgcttgcagaggcg  
acacacgaagcgatcgttggcgtcggcaaacagtggtccggcgcacgcgctctggaggccttgcacgggtggcgga  
gagttgagaggtccaccgttacagttggacacaggccaacttctcaagattgcaaagcgtggcggtgaccgcagtg  
aggcagtgcatgcatggcgcaatgcaactgacgggtgccccct

C terminal domain (*Bsal* overhangs are capitalized):

AGCAAttgtgcccagttatctcgccctgatccggcggtggccgcttgaccaacgaccacctcgtcgccttggcctgcctcg  
gcgacgtcctcgcgtggatgcagtgaaaaagggttgcgcacgcgcccgttgatcaaaagaaccaatcgccgtat  
tccgaacgcacatcccatcgcgttgc

Repeat domain: (Capital letters correspond to *Bsal* overhangs, nnnnnn correspond to two codons encoding the repeat-variable diresidues (RVD) that determine specificity for DNA bases)

GAACccccggagcaggtggtggccatcgccagcnnnnnngcggttaagcaggcgctggagacggtgcagcggct  
gttgcgggtgctgtgccaggccatggcctgacACCGgagcaggtggtggccatcgccagcnnnnnnggtggcaag  
caggcgctggagacggtgcagcggctgttgcgggtgctgtgccaggccatggcctCACccggagcaggtggtggc  
catcgccagcnnnnnngcggttaagcaggcgctggagacggtgcagcggctgttgcgggtgctgtgccaggccatgg  
cctgACTCcgagcaggtggtggccatcgccagcnnnnnnggtggcaagcaggcgctggagacggtgcagcggct  
gttgcgggtgctgtgccaggcCCATggcctgacccccggagcaggtggtggccatcgccagcnnnnnnggtggcaag  
caggcgctGGAGacggtgcagcggctgttgcgggtgctgtgccaggcgcatggcTTACccccggagcaggtggtg  
gcatcgccagcnnnnnnggtggcaagcaggcgctggagacggtgcagcggctgttgcgggtgctgtgccaggccat  
ggcCTGAccccggagcaggtggtggccatcgccagcnnnnnngcggttaagcaggcgctggagacggtgcagcg  
gctgttgcgggtgctgtgccaggccatggcctgacACCGgagcaggtggtggccatcgccagcnnnnnnggtggca  
agcaggcgctggagacggtgcagcggctgttgcgggtgctgtgccaggccatggcctCACccggagcaggtggtg  
gcatcgccagcnnnnnngcggttaagcaggcgctggagacggtgcagcggctgttgcgggtgctgtgccaggccat  
ggcctgACTCcgagcaggtggtggccatcgccagcnnnnnnggtggcaagcaggcgctggagacggtgcagcg  
gctgttgcgggtgctgtgccaggcCCATggcctgacccccggagcaggtggtggccatcgccagcnnnnnnggtggca  
agcaggcgctGGAGacggtgcagcggctgttgcgggtgctgtgccaggcgcatggcTTACccccggagcaggtgg  
tgccatcgccagcnnnnnnggtggcaagcaggcgctggagacggtgcagcggctgttgcgggtgctgtgccaggcc  
atggcCTGAccccggagcaggtggtggccatcgccagcnnnnnngcggttaagcaggcgctggagacggtgcag

cggctgtgccggtgctgtgccaggcccatggcctgacACCGgagcaggtggtggccatgccagcnnnnnnggtg  
caagcaggcgctggagacgggtgcagcggctgtgccggtgctgtgccaggcccatggcctCACCCcggagcaggtg  
gtggccatgccagcnnnnnngcggtaagcaggcgctggagacgggtgcagcggctgtgccggtgctgtgccaggcc  
catggcctgACTCcgagcaggtggtggccatgccagcnnnnnnggtggcaagcaggcgctggagacgggtgcag  
cggctgtgccggtgctgtgccaggcCCATggcctgaccccggagcaggtggtggccatgccagcnnnnnnggtg  
caagcaggcgc

Vp16 activation domain:

GGTGttcatctcgacgggtgaggacgtggctatggcacacgccgatgcgctggatgattttgacctggatatgctgggtgat  
ggcgacagcccaggacccggttcacgccacacgactcggctccgtacggagcgtggacaccgctgacttcgagttc  
agcagatgttcaccgacgccctgggaatcgacgaatacggtggt
