# Supplementary material for: Transgenic Expression of the Anti-parasitic Factor TEP1 in the Malaria Mosquito Anopheles gambiae
Source: PLoS Pathog. 2017 Jan 17;13(1):e1006113. doi: 10.1371/journal.ppat.1006113 (PMC5240933; doi:10.1371/journal.ppat.1006113)
Supplement: S1 Table — Control mosquitoes and TEP1-GFP transgenic mosquitoes were grown together as larvae. Immediately prior to infectious blood feeding mosquitoes were selected according to their GFP expression level separating into two groups with low or high expression. 7 days after infection, oocysts were counted and compared between the three groups. n is the number of analyzed midguts in each condition. p values were calculated for the difference in oocyst numbers between low and high GFP expressing groups, using the non parametric Mann-Whitney t test. (XLSX) [file ppat.1006113.s001.xlsx]

## Sheet: S1
		control			low GFP			high GFP
	Infection	n	mean # oocysts	prevalence %	n	mean # oocysts	prevalence %	n	mean # oocysts	prevalence %	p value
	1	8	36.4	87.5	15	32.9	87	20	64.4	80	ns
	2	19	46.7	84	15	57.8	87	24	107.1	92	ns
	3	24	69.3	100	13	66.1	100	26	104.4	96	ns
	4	51	27.7	78	44	80.23	97	38	52.1	81	0.0095
	5	15	111.2	100	29	64	100	14	97.6	86	ns
